# Supplementary material
Source: MDPI journal article supplement (https://www.mdpi.com/2311-7524/7/6/139)
Supplement: s1 [file s1]

**Supplement Table S1.** Regression equations and R<sup>2</sup> values for the plant height, leaf area, shoot fresh mass, shoot dry mass, root fresh mass, root dry mass, root shoot ratio, seedling index, leaf area/shoot dry mass, shoot dry matter rate, chlorophyll and carotene for cucumber seedlings, where X is the daily light integral (DLI). Plots of each equation are shown in Figure 2-6.

| Item                  | Regression equation               | R <sup>2</sup> |
|-----------------------|-----------------------------------|----------------|
| Plant height          | $21.18294-3.13433X+0.14034X^2$    | 0.92566        |
| Leaf area             | $304.56358-44.91728X+2.02821X^2$  | 0.42432        |
| Shoot fresh mass      | $9.23685-1.22641X+0.05375X^2$     | 0.81438        |
| Shoot dry mass        | $546.92811-58.89439X+2.62381X^2$  | 0.66352        |
| Root fresh mass       | $-2.35698+0.83258X-0.04726X^2$    | 0.67459        |
| Root dry mass         | $-60.5352+25.15409X-1.34649X^2$   | 0.42640        |
| Root shoot ratio      | $-0.34+0.1156X-0.0057X^2$         | 0.56635        |
| Seedling index        | $-1.11934+0.42106X-0.02163X^2$    | 0.65104        |
| Leaf area ratio       | $885.86896-133.33904X+6.98887X^2$ | 0.57983        |
| Shoot dry matter rate | $0.04951+0.00406X$                | 0.58578        |
| Soluble sugar content | $-4.74816+1.33773X$               | 0.79700        |
| Soluble protein       | $7.82867+0.58037X-0.04773X^2$     | 0.75865        |
| Chlorophyll a         | $1.51404-0.0638X$                 | 0.89390        |
| Chlorophyll b         | $0.51218-0.02316X$                | 0.91878        |
| Total Chlorophyll     | $2.03678-0.08808X$                | 0.92129        |
| Carotene              | $0.32164-0.01162X$                | 0.87442        |

**Supplement Table S2.** The effect of different light intensity and photoperiod on hypocotyl length, stem diameter and leaf area of cucumber seedling.

| Treatments | hypocotyl length /cm     | stem diameter /mm        | Leaf area /cm <sup>2</sup> |
|------------|--------------------------|--------------------------|----------------------------|
| T1         | 6.35 ± 0.09 <sup>a</sup> | 2.61 ± 0.04 <sup>a</sup> | 62.48 ± 1.56 <sup>b</sup>  |
| T2         | 6.52 ± 0.14 <sup>a</sup> | 2.72 ± 0.05 <sup>a</sup> | 59.48 ± 1.10 <sup>b</sup>  |
| T3         | 6.47 ± 0.15 <sup>a</sup> | 2.64 ± 0.05 <sup>a</sup> | 63.89 ± 1.77 <sup>b</sup>  |
| T4         | 6.29 ± 0.18 <sup>a</sup> | 2.60 ± 0.07 <sup>a</sup> | 68.98 ± 1.71 <sup>a</sup>  |

**Supplement Table S3.** The effect of different light intensity and photoperiod on photosynthesis pigments content of cucumber seedling.

| Treatment | Chlorophyll a<br>/mg·g <sup>-1</sup> | Chlorophyll b<br>/mg·g <sup>-1</sup> | Chlorophyll<br>a/b       | Total<br>Chlorophyll<br>/mg·g <sup>-1</sup> | Carotenoid<br>/mg·g <sup>-1</sup> |
|-----------|--------------------------------------|--------------------------------------|--------------------------|---------------------------------------------|-----------------------------------|
| T1        | 0.85 ± 0.01 <sup>c</sup>             | 0.28 ± 0.00 <sup>c</sup>             | 3.04 ± 0.03 <sup>a</sup> | 1.13 ± 0.01 <sup>c</sup>                    | 0.42 ± 0.00 <sup>c</sup>          |
| T2        | 0.92 ± 0.02 <sup>b</sup>             | 0.32 ± 0.00 <sup>b</sup>             | 2.89 ± 0.04 <sup>b</sup> | 1.23 ± 0.02 <sup>b</sup>                    | 0.45 ± 0.01 <sup>b</sup>          |
| T3        | 1.03 ± 0.01 <sup>a</sup>             | 0.36 ± 0.00 <sup>a</sup>             | 2.84 ± 0.02 <sup>b</sup> | 1.39 ± 0.02 <sup>a</sup>                    | 0.51 ± 0.01 <sup>a</sup>          |
| T4        | 1.02 ± 0.01 <sup>a</sup>             | 0.36 ± 0.00 <sup>a</sup>             | 2.83 ± 0.02 <sup>b</sup> | 1.38 ± 0.01 <sup>a</sup>                    | 0.51 ± 0.00 <sup>a</sup>          |
